# Supplementary material for: Structural basis for binding diversity of acetyltransferase p300 to the nucleosome
Source: PubMed Central journal article supplement (PMC9218434; doi:10.1016/j.isci.2022.104563), 2022-06-09
Supplement: mmc1.pdf [file mmc1.pdf]

iScience, Volume 25

## **Supplemental information**

### **Structural basis for binding diversity of acetyltransferase p300 to the nucleosome**

**Suguru Hatazawa, Jiuyang Liu, Yoshimasa Takizawa, Mohamad Zandian, Lumi Negishi, Tatiana G. Kutateladze, and Hitoshi Kurumizaka**

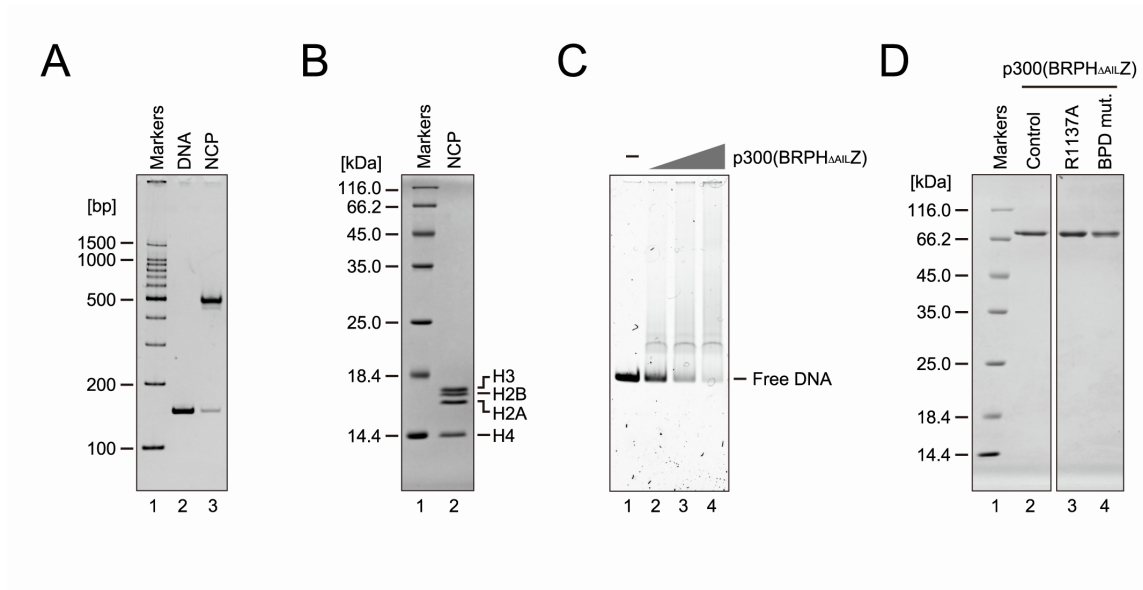

**Figure S1. Preparation of the NCP and the p300(BRPH $\Delta$ AILZ) proteins and assay for p300(BRPH $\Delta$ AILZ)-DNA binding, related to Figures 1 and 3.** (A) The 145 base-pair Widom 601 DNA and the purified NCP containing the DNA were analyzed by non-denaturing 6% polyacrylamide gel electrophoresis with ethidium bromide staining. (B) The nucleosomal histones were analyzed by 18% SDS-polyacrylamide gel electrophoresis with Coomassie Brilliant Blue staining. (C) Electrophoretic mobility shift assay of p300(BRPH $\Delta$ AILZ) and the naked 145 base-pair Widom 601 DNA. The binding of p300(BRPH $\Delta$ AILZ) and DNA was analyzed by non-denaturing 4% polyacrylamide gel electrophoresis with SYBR Gold staining. (D) The purified p300(BRPH $\Delta$ AILZ) proteins were analyzed by 12% SDS-polyacrylamide gel electrophoresis with Coomassie Brilliant Blue staining.

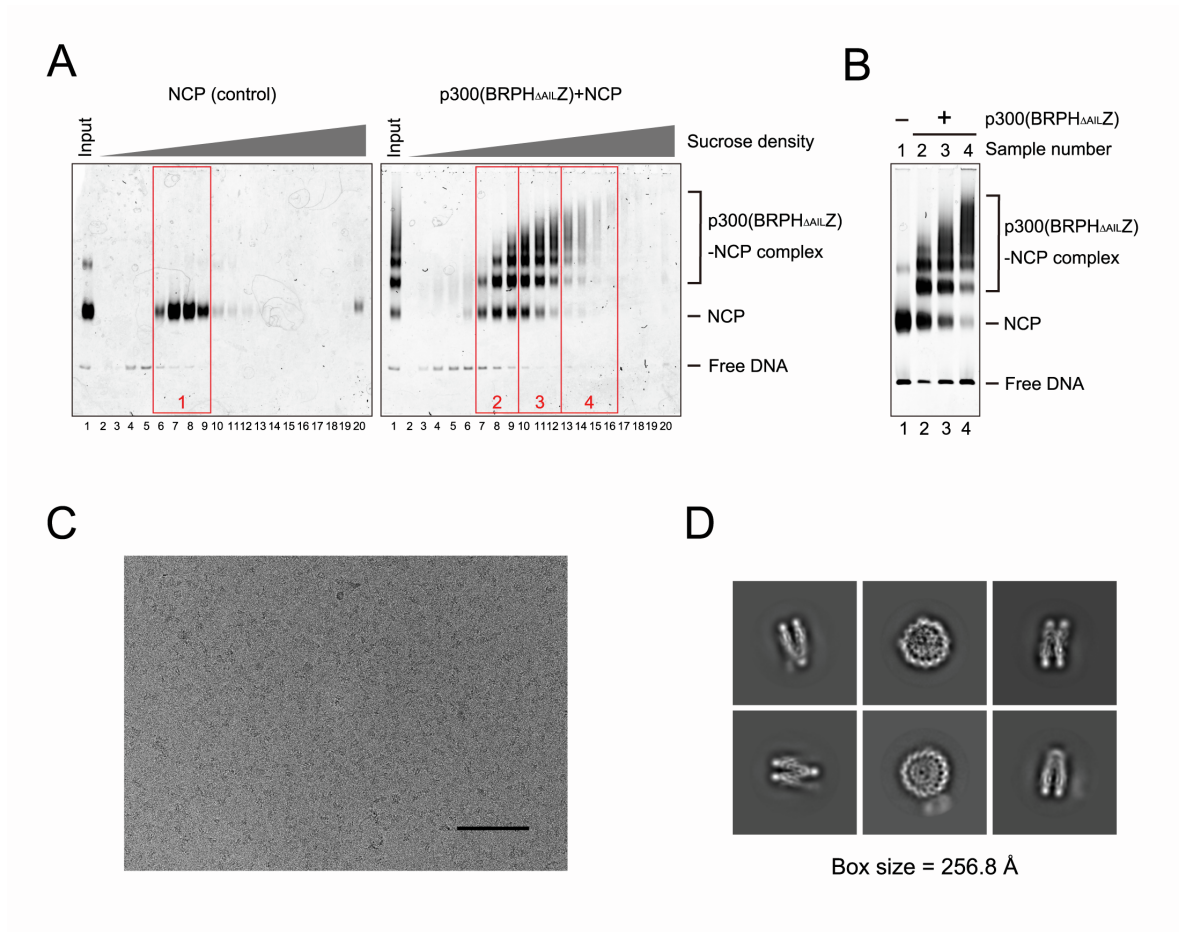

**Figure S2. Preparation and cryo-EM analysis of the p300(BRPH $\Delta$ AILZ)-NCP complexes, related to Figures 2 and 4.** (A) The p300(BRPH $\Delta$ AILZ)-NCP complexes were purified by sucrose density gradient centrifugation, and the collected fractions were analyzed by non-denaturing 4% polyacrylamide gel electrophoresis with SYBR Gold staining. The fractions shown in the red frames were combined. (B) The purified NCP and p300(BRPH $\Delta$ AILZ)-NCP samples were analyzed by non-denaturing 4% polyacrylamide gel electrophoresis with SYBR Gold staining. Sample number 3 was used for the cryo-EM analysis. (C) A representative image from a digital cryo-EM micrograph of the p300(BRPH $\Delta$ AILZ)-NCP complexes. Scale bar indicates 100 nm. (D) Representative 2D class averages of the p300(BRPH $\Delta$ AILZ)-NCP complex from single particle images.

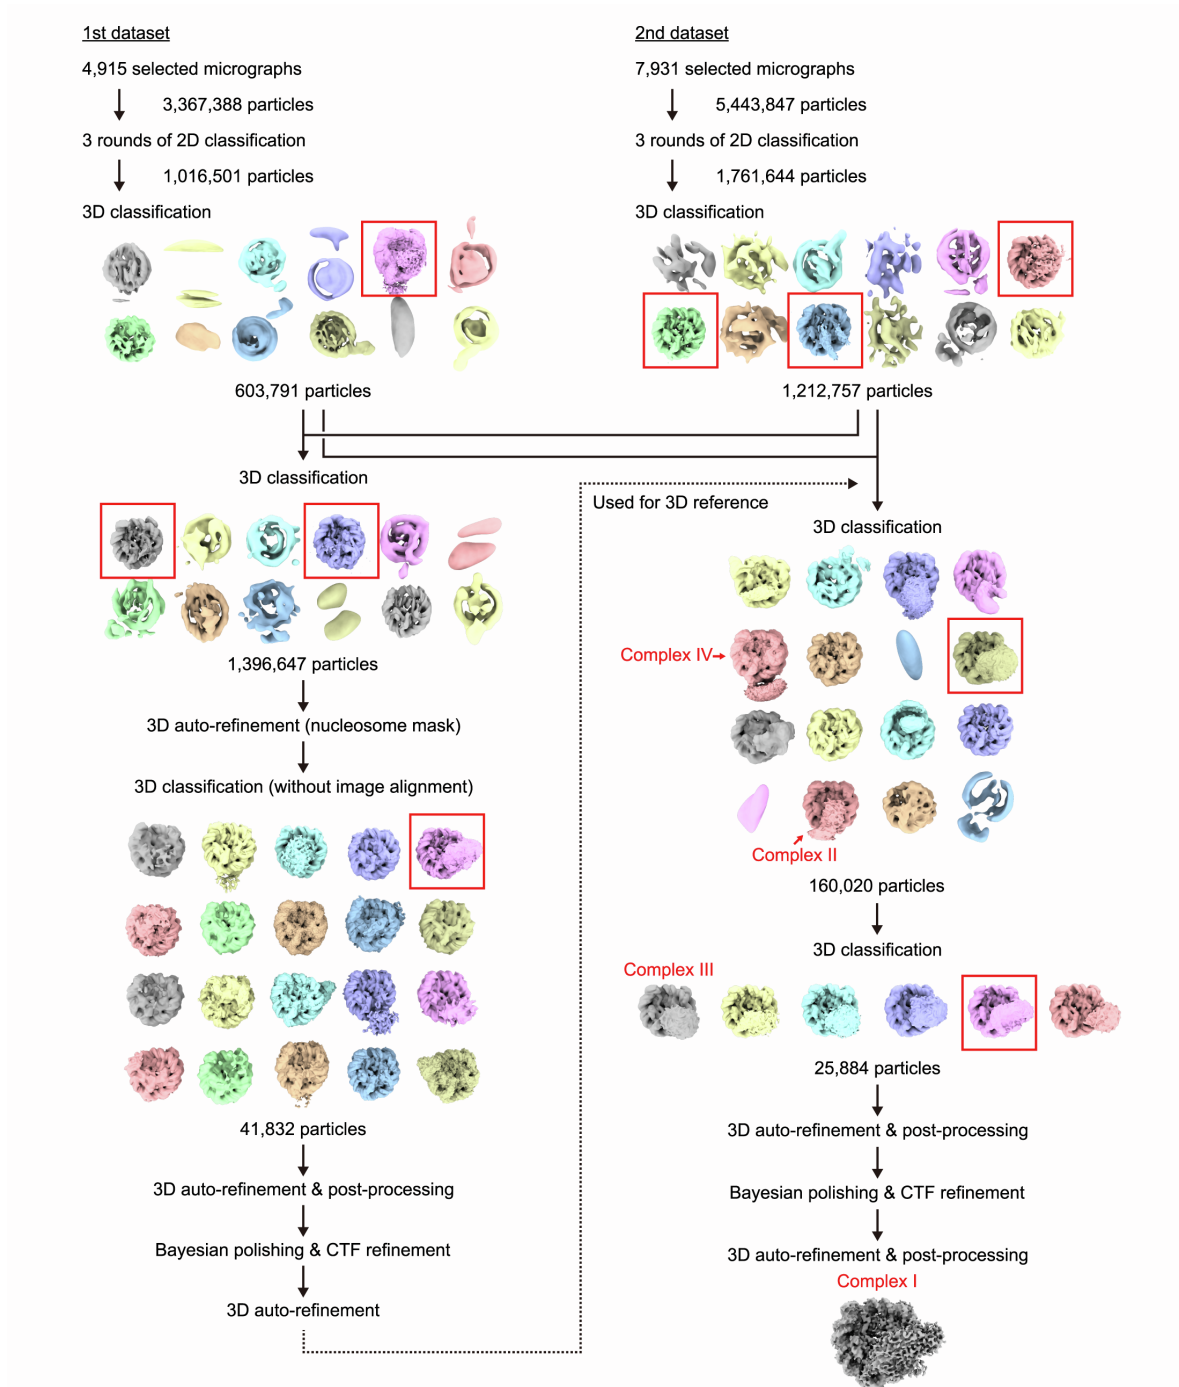

**Figure S3. Workflow for cryo-EM processing of the p300(BRPH<sub>ΔAILZ</sub>)-NCP complex related to Figures 2 and 4.** The particles contained in the classes enclosed by the red squares were used in the subsequent processes.

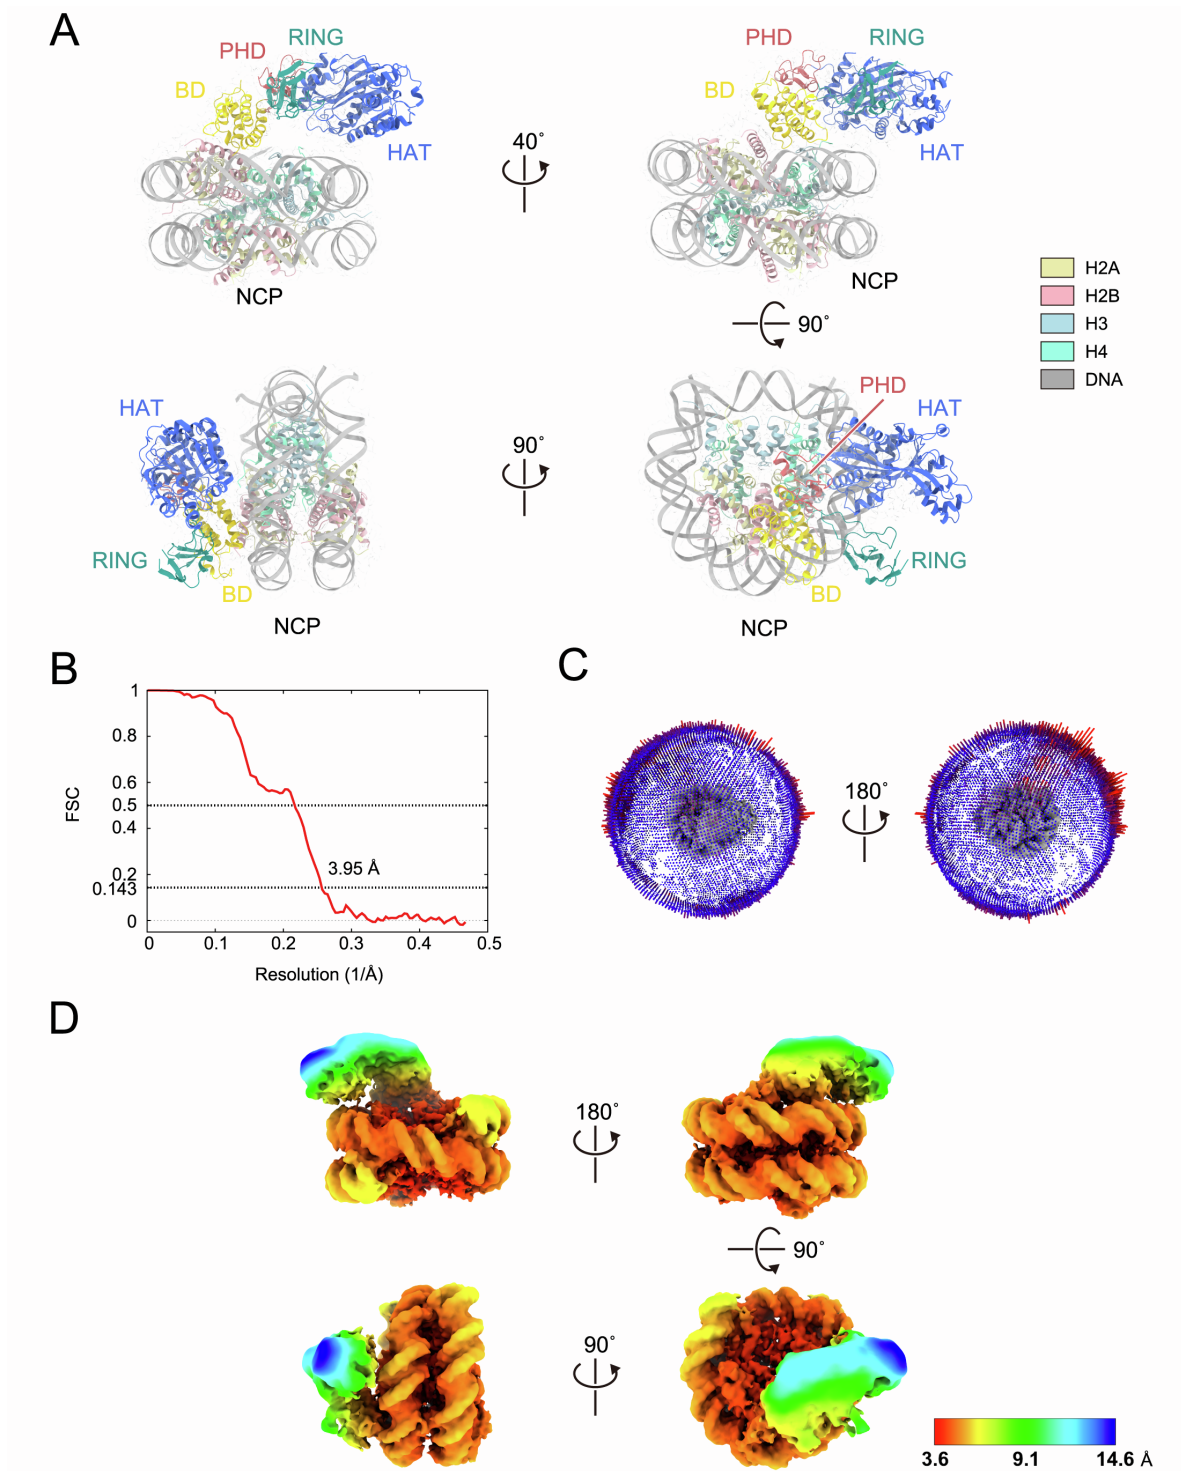

**Figure S4. Cryo-EM structure of the p300(BRPH $\Delta$ AILZ)-NCP complex I, related to Figure 2. (A)**

The overall structure of the p300(BRPH $\Delta$ AILZ)-NCP complex I. The crystal structures of the NCP and

the p300 catalytic core are superimposed on the cryo-EM map. (B) Gold-standard Fourier Shell Correlation (FSC) curve of the p300(BRPH<sub>ΔAILZ</sub>)-NCP complex I. Its overall resolution is 3.95 Å at FSC = 0.143. (C) Angular distribution of model projections of the p300(BRPH<sub>ΔAILZ</sub>)-NCP complex I. (D) Local resolution map of the p300(BRPH<sub>ΔAILZ</sub>)-NCP complex I estimated by the RELION 3.1 postprocess, showing the resolution range across the map from 3.6 Å to 14.6 Å.

**A**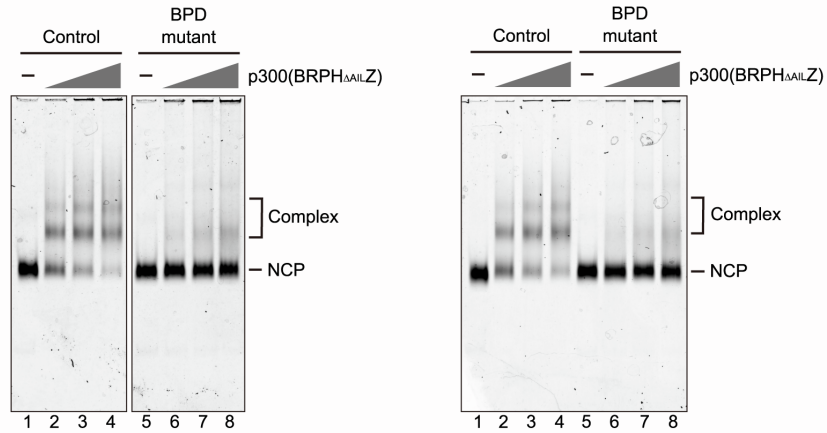**B**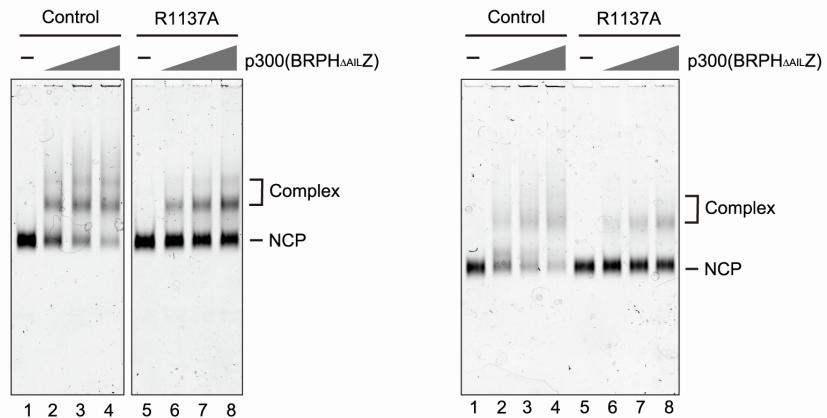

**Figure S5. Replicated experiments related to Figure 3.** (A) Electrophoretic mobility shift assay of the p300(BRPH $\Delta$ AILZ) or p300(BRPH $\Delta$ AILZ) BPD mutant (K1456A/K1459A/K1461A/R1462A) and the NCP. Complex formation was analyzed by non-denaturing 4% polyacrylamide gel electrophoresis with SYBR Gold staining. (B) Electrophoretic mobility shift assay of the p300(BRPH $\Delta$ AILZ) or p300(BRPH $\Delta$ AILZ) R1137A mutant and the NCP. Complex formation was analyzed by non-denaturing 4% polyacrylamide gel electrophoresis with SYBR Gold staining.
